# Supplementary material for: Lobular Carcinoma of the Breast: A Comprehensive Review with Translational Insights
Source: MDPI journal article supplement (doi:10.3390/cancers15225491), 2023-11-20
Supplement: s1 [file s1]

**Supplementary Table S1:****Treatment schema in ILC**

| <i>Early stage ILC treatment</i>                                                                                                                                                          | <i>Salient points to note</i>                                                                                                                                                                                                                                                                                                          |
|-------------------------------------------------------------------------------------------------------------------------------------------------------------------------------------------|----------------------------------------------------------------------------------------------------------------------------------------------------------------------------------------------------------------------------------------------------------------------------------------------------------------------------------------|
| No specific guidelines                                                                                                                                                                    |                                                                                                                                                                                                                                                                                                                                        |
| Options include neoadjuvant/adjuvant chemotherapy or endocrine therapy                                                                                                                    | <ul style="list-style-type: none"> <li>- Neoadjuvant is less effective in ILC compare to IDC (Section 9.1)</li> <li>- adjuvant chemotherapy is effective in a subset of lobular carcinoma cases (clinically high-risk cases with gross lymph node involvement, larger tumor size and lymphovascular invasion) (Section 9.5)</li> </ul> |
| Considerations for chemotherapy: molecular risk (grade, molecular tools like Oncotype DX or Mammaprint) and tumor burden ( size and number of involved lymph nodes and menopausal status) |                                                                                                                                                                                                                                                                                                                                        |

| <i>Treatment in metastatic setting</i>                                                                                            |                                                              |                                                                                       |
|-----------------------------------------------------------------------------------------------------------------------------------|--------------------------------------------------------------|---------------------------------------------------------------------------------------|
| First line                                                                                                                        | Second line                                                  | Additional                                                                            |
| i) Endocrine therapy +/- CDK4/6i<br><br>Abemaciclib (MONARCH 2,3)<br>Ribociclib (MONALEESA 2,3 AND 7)<br>Palbociclib (PALOMA 2,3) | Alpelisib +ET (PIK3CA)                                       | Standard chemotherapies                                                               |
|                                                                                                                                   | PARPi (in gBRCA1/2, sBRCA, gPALB2 mutations)                 |                                                                                       |
|                                                                                                                                   | Pembrolizumab (MSI-H/dMMR)                                   |                                                                                       |
| ii) Endocrine therapy alone followed by CDK4/6i + ET (SONIA trial)                                                                | Everolimus+ Exmestane or Fulvestrant                         | Trastuzumab+ Deruxtecan (DESTINY-Breast 04)<br><br>Sacituzumab Govitecan (Tropics 02) |
|                                                                                                                                   | Fulvestrant+ alternative CDK4/6i (Ribociclib or Abemaciclib) |                                                                                       |
|                                                                                                                                   | Fulvestrant alone (less preferred)                           |                                                                                       |
|                                                                                                                                   | Latest is Elacestrant in ESR1 mutated cases                  |                                                                                       |
